# Supplementary material for: Invasive Fungal Rhinosinusitis with and without Orbital Complications: Clinical and Laboratory Differences
Source: MDPI journal article supplement (doi:10.3390/jof7070573), 2021-07-18
Supplement: s1 [file s1]

## Supplementary Data

Supplementary Table S1. Microbiology

|                         | All patients<br>(n=35) | IFSsOC<br>(n=26) | IFSwOC<br>(n=9) | <i>p</i> value |
|-------------------------|------------------------|------------------|-----------------|----------------|
| <b>Fungus (%)</b>       |                        |                  |                 |                |
| Aspergillus             | 27 (77.1%)             | 22 (84.6%)       | 5 (55.6%)       | 0.162          |
| Mucor                   | 3 (8.6%)               | 1 (3.8%)         | 2 (22.2%)       | 0.156          |
| Scedosporium spp.       | 1 (2.9%)               | 1 (3.8%)         | 0 (0.0%)        | 1.000          |
| Candida guilliermondii  | 1 (2.9%)               | 0 (0.0%)         | 1 (11.1%)       | 0.257          |
| Scopulariopsis          | 1 (2.9%)               | 1 (3.8%)         | 0 (0.0%)        | 1.000          |
| Not isolated            | 3 (8.6%)               | 2 (7.7%)         | 1 (11.1%)       | 1.000          |
|                         | All patients<br>(n=31) | IFSsOC<br>(n=22) | IFSwOC<br>(n=9) | <i>p</i> value |
| <b>Bacteria (%)</b>     |                        |                  |                 |                |
| Pseudomonas aeruginosa  | 4 (12.9%)              | 3 (13.6%)        | 1 (11.1%)       | 1.000          |
| Hemophilus influenza    | 5 (16.1%)              | 3 (13.6%)        | 2 (22.2%)       | 0.613          |
| Staphylococcus aureus   | 5 (16.1%)              | 3 (13.6%)        | 2 (22.2%)       | 0.613          |
| Propionibacterium spp.  | 5 (16.1%)              | 3 (13.6%)        | 2 (22.2%)       | 0.613          |
| Prevotella spp.         | 3 (9.7%)               | 3 (13.6%)        | 0 (0.0%)        | 0.537          |
| Parvimonas micra        | 2 (6.5%)               | 2 (9.1%)         | 0 (0.0%)        | 1.000          |
| Acinetobacter baumannii | 3 (9.7%)               | 1 (4.5%)         | 2 (22.2%)       | 0.195          |
| Not isolated            | 4 (12.9%)              | 3 (13.6%)        | 1 (11.1%)       | 1.000          |

Abbreviations: IFS, invasive fungal rhinosinusitis; spp., species  
 Bold indicates statistically significant ( $p < 0.05$ )

**Supplementary Table S2. Clinical characteristics of 3 IFSwOC patients with poor prognosis**

| Case NO. | Symptoms                              | Sinus                                         | Fungus       | Clinical course                                                                   | Mortality or sequella                                       |
|----------|---------------------------------------|-----------------------------------------------|--------------|-----------------------------------------------------------------------------------|-------------------------------------------------------------|
| 1        | Left eye proptosis, erythema, fever   | Left ethmoid and bilateral sphenoid sinus     | Mucormycosis | Left ICA, MCA dissecting pseudoaneurysm, SAH, ICH, IVH                            | Mortality                                                   |
| 2        | Headache, fever, diplopia and ptosis  | Right posterior ethmoid and maxillary sinuses | Aspergillus  | Bilateral cavernous sinus thrombosis, skull base osteomyelitis, fungal meningitis | Bilateral CN2, right CN3, 6 palsies                         |
| 3        | Blurred vision, proptosis, hemiplegia | Right sphenoid and posterior ethmoid sinuses  | Mucormycosis | Sepsis , right cerebral, cerebellar and brainstem infarctions                     | Right eye decreased vision and permanent neurologic deficit |

*Abbreviations: ICA: internal carotid artery; MCA: middle cerebral artery; SAH: subarachnoid hemorrhage; ICH: intracerebral hemorrhage; IVH: intraventricular hemorrhage; CN: cranial nerve*

**Supplementary Table S3. Prognostic factors of IFSwOC**

|                            | With sequelae or<br>mortality (%) | <i>p</i> value |
|----------------------------|-----------------------------------|----------------|
| <b>All patients</b>        | 33.3                              |                |
| <b>Age</b>                 |                                   | 0.948          |
| <b>Gender</b>              |                                   |                |
| Male                       | 100.0                             | <b>0.012</b>   |
| Female                     | 0.0                               | <b>0.012</b>   |
| <b>Side</b>                |                                   |                |
| Left                       | 20.0                              | 0.524          |
| Right                      | 33.3                              | 1.000          |
| <b>Location</b>            |                                   |                |
| Maxillary                  | 100.0                             | 0.083          |
| Sphenoid                   | 14.3                              | 0.083          |
| Anterior ethmoid           | 100.0                             | 0.333          |
| Posterior ethmoid          | 100.0                             | <b>0.012</b>   |
| <b>Underlying diseases</b> |                                   |                |
| Hypertension               | 60.0                              | 0.167          |
| Diabetes mellitus          | 66.7                              | 0.226          |
| Coronary artery disease    | 0.0                               | 0.500          |
| Hyperlipidemia             | 0.0                               | 1.000          |
| Atrial fibrillation        | 100.0                             | 0.333          |
| <b>Symptoms</b>            |                                   |                |
| Headache                   | 14.3                              | 0.083          |
| Diplopia                   | 16.7                              | 0.226          |
| Fever                      | 40.0                              | 1.000          |
| Blurred vision             | 33.3                              | 1.000          |
| Facial swelling            | 100.0                             | 0.333          |
| Proptosis                  | 100.0                             | 0.083          |
| Ptosis                     | 50.0                              | 1.000          |
| Hemiparesis                | 100.0                             | 0.333          |
| Consciousness disturbance  | 100.0                             | 0.333          |
| Seizure                    | 100.0                             | 0.333          |
| <b>Fungus</b>              |                                   |                |
| Aspergillus                | 20.0                              | 0.524          |
| Mucor                      | 100.0                             | 0.083          |
| Candida guilliermondii     | 0.0                               | 1.000          |

|                                                                                            |       |              |
|--------------------------------------------------------------------------------------------|-------|--------------|
| Not isolated                                                                               | 0.0   | 1.000        |
| <b>Bacteria</b>                                                                            |       |              |
| Pseudomonas aeruginosa                                                                     | 100.0 | 0.333        |
| Hemophilus influenza                                                                       | 50.0  | 1.000        |
| Staphylococcus aureus                                                                      | 0.0   | 0.500        |
| Propionibacterium spp.                                                                     | 0.0   | 0.500        |
| Acinetobacter baumannii                                                                    | 100.0 | 0.083        |
| <b>Lab data</b>                                                                            |       |              |
| WBC ( $\geq 9000\mu\text{L}$ )                                                             | 75.0  | <b>0.048</b> |
| CRP ( $\geq 6.91\text{mg/dL}$ )                                                            | 75.0  | <b>0.048</b> |
| ESR ( $\geq 69\text{ mm/hour}$ )                                                           | 100.0 | <b>0.036</b> |
| <b>Interval between onset of symptoms and surgery (<math>\geq 10.5\text{ days}</math>)</b> | 50.0  | 0.524        |
| <b>Antifungal therapy</b>                                                                  |       |              |
| Voriconazole                                                                               | 14.3  | 0.083        |
| Amphotericin B                                                                             | 100.0 | 0.333        |
| Liposomal amphotericin B                                                                   | 100.0 | 0.083        |
| Others                                                                                     | 100.0 | 0.083        |

---

*Abbreviations: IFS, invasive fungal sinusitis; SD, standard deviation*  
*Values in red indicate statistically significant ( $p < 0.05$ )*
